# Supplementary material for: Determination of the Microbial and Chemical Loads in Rivers from the Quito Capital Province of Ecuador (Pichincha)—A Preliminary Analysis of Microbial and Chemical Quality of the Main Rivers
Source: PubMed Central journal article supplement (PMC7400137; doi:10.3390/ijerph17145048), 2020-07-14
Supplement: ijerph-17-05048-s001.pdf [file ijerph-17-05048-s001.pdf]

## Supplementary Materials:

**Table S1.** Name of the rivers and location on the map of Pichincha, with its coordinates and water samples collection date.

| Location | Rivers       | Coordinates              | Dates of collection |
|----------|--------------|--------------------------|---------------------|
| 1        | Machángara   | 0°14'2"S 78°30'54"W      | 31/01/2016-18/06/16 |
| 2        | Guayllabamba | 0°04'01.8"S 78°22'27.3"W | 18/05/2016-31/05/16 |
| 3        | San Pedro    | 0°22'17.7"S 78°30'13.1"W | 27/01/2017-18/11/17 |
| 4        | Pita         | 0°18'16.3"S 78°27'03.6"W | 27/01/2017-18/11/17 |
| 5        | Monjas       | 0°01'48.5"S 78°26'57.4"W | 27/01/2017-13/04/17 |
| 6        | Blanco       | 0°00'23.7"N 78°54'12.6"W | 10/02/2017-21/01/18 |
| 7        | Mindo        | 0°03'33.4"S 78°46'16.2"W | 10/02/2017-21/01/18 |
| 8        | Cinto        | 0°06'46.2"S 78°47'13.1"W | 10/02/2017-21/01/18 |
| 9        | Pisque       | 0°01'27"S 78°20'0"W      | 03/03/2017-10/01/18 |
| 10       | Chiche       | 0°11'36.3"S 78°22'25.1"W | 03/03/2017-18/11/17 |
| 11       | Pilatón      | 0°22'9"S 78°49'60"W      | 17/03/2017-13/01/18 |
| 12       | Pachijal     | 0°09'41.9"N 78°56'14.9"W | 24/03/2017-26/01/18 |
| 13       | Alambi       | 0°07'59"N 78°40'16"W     | 24/03/2017-13/04/17 |
| 14       | Caoní        | 0°04'31"N 79°02'60"W     | 24/03/2017-26/01/18 |
| 15       | Mashpi       | 0°11'18.5"N 78°55'35.1"W | 24/03/2017-06/01/18 |
| 16       | Guachalá     | 0°0'19"N 78°10'28"W      | 07/04/2017-03/12/17 |
| 17       | Granobles    | 0°3'22"N 78°9'50"W       | 07/04/2017-10/01/18 |
| 18       | Pedregales   | 0°29'26"S 78°32'25"W     | 07/04/2017-07/01/18 |

**Table S2. Recovery percentage, reproducibility percentage, accuracy percentage, detection, and quantification limits obtained from metal analysis employing the ICP-OES.**

| Elements Parameters                 |         | Al    | Ba     | Cd     | Cr     | Cu     | Fe    | Pb     | Mn    | Ni     | V      | Zn     | Co    | Ca     | Mg     | Na     |
|-------------------------------------|---------|-------|--------|--------|--------|--------|-------|--------|-------|--------|--------|--------|-------|--------|--------|--------|
| Recovery (%)                        | Run 1   | 90.67 | 95.40  | 96.19  | 97.24  | 96.72  | 93.07 | 105.81 | 96.67 | 89.43  | 101.41 | 94.75  | -     | 105.42 | 93.43  | 100.38 |
|                                     | Run 2   | -     | -      | 112.08 | 105.21 | 101.70 | -     | -      | 93.27 | 103.97 | 100.53 | 100.92 | 98.98 | 91.81  | 118.53 | 96.04  |
| Limit of detection (LD) (µg/L)      | Run 1   | 1.92  | 4.09   | 0.16   | 0.29   | 1.23   | 0.78  | 3.24   | 0.18  | 1.00   | 2.03   | 0.42   | -     | 0.20   | 0.06   | 0.04   |
|                                     | Run 2   | -     | -      | 0.24   | 0.40   | 2.50   | -     | -      | 0.25  | 0.83   | 0.63   | 0.65   | 0.51  | 0.02   | 0.06   | 0.09   |
| Limit of quantification (LQ) (µg/L) | Run 1   | 6.39  | 13.62  | 0.52   | 0.97   | 4.11   | 2.61  | 10.81  | 0.60  | 3.34   | 6.77   | 1.40   | -     | 0.66   | 0.20   | 0.14   |
|                                     | Run 2   | -     | -      | 0.80   | 1.33   | 8.32   | -     | -      | 0.83  | 2.77   | 2.09   | 2.16   | 1.71  | 0.06   | 0.021  | 0.31   |
| Accuracy (%)                        | Run 1   | 0.19  | 2.95   | 4.89   | 3.55   | 1.61   | 0.34  | 13.09  | 2.44  | 2.55   | 6.75   | 2.58   | -     | 0.07   | 2.97   | 0.78   |
|                                     | Run 2   | -     | -      | 3.92   | 4.12   | 4.91   | -     | -      | 4.72  | 4.08   | 5.47   | 3.87   | 4.58  | 0.00   | 5.30   | 5.73   |
|                                     | Average | 0.19  | 2.95   | 4.40   | 3.83   | 3.26   | 0.34  | 13.09  | 3.58  | 3.32   | 6.11   | 3.23   | 4.58  | 0.03   | 4.13   | 3.25   |
|                                     | σ       | -     | -      | 0.69   | 0.40   | 2.34   | -     | -      | 1.61  | 1.08   | 0.90   | 0.91   | -     | 0.03   | 1.16   | 2.47   |
| Reproducibility                     | Run 1   | 0.09  | 0.05   | 0.04   | 0.03   | 0.03   | 0.07  | 0.06   | 0.03  | 0.11   | 0.01   | 0.05   | -     | 0.05   | 0.07   | 0.00   |
|                                     | Run 2   | -     | -      | 0.12   | 0.05   | 0.02   | -     | -      | 0.07  | 0.04   | 0.01   | 0.01   | 0.01  | 0.08   | 0.19   | 0.04   |
|                                     | Average | 0.09  | 0.05   | 0.08   | 0.04   | 0.02   | 0.07  | 0.06   | 0.05  | 0.07   | 0.01   | 0.03   | 0.01  | 0.01   | 0.06   | 0.02   |
|                                     | σ       | -     | -      | 0.06   | 0.02   | 0.01   | -     | -      | 0.02  | 0.05   | 0.01   | 0.03   | -     | 0.06   | 0.13   | 0.02   |
| CRM 1640a (µg/L)                    |         | 53.00 | 151.80 | 3.99   | 40.54  | 85.75  | 36.80 | 12.10  | 40.39 | 25.32  | 15.05  | 55.64  | 20.34 | 5.61   | 1.05   | 3.13   |

Legend: Values obtained with recovery percentages too far from 100% were replaced with (-) sign.
